# Supplementary material
Source: MDPI journal article supplement (https://www.mdpi.com/2073-4395/10/11/1730)
Supplement: s1 [file s1]

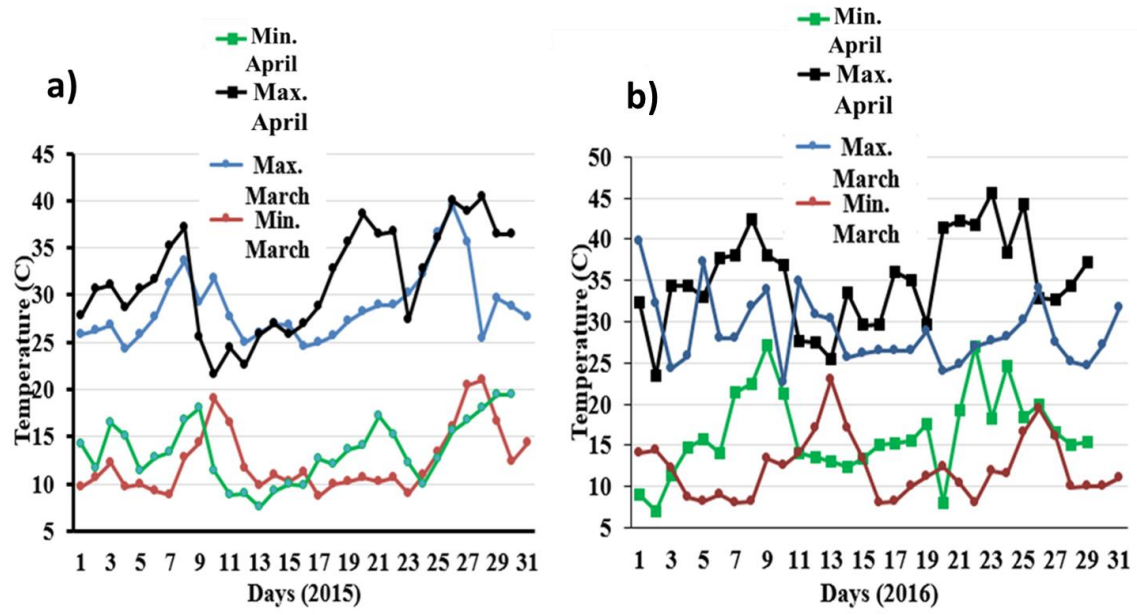

**Figure 1.** Daily temperatures, Maximum (Max.), minimum (Min.); a) March and April 2015, b) March and April 2016 at the experimental station of Assiut University. Sallam et al. [23]

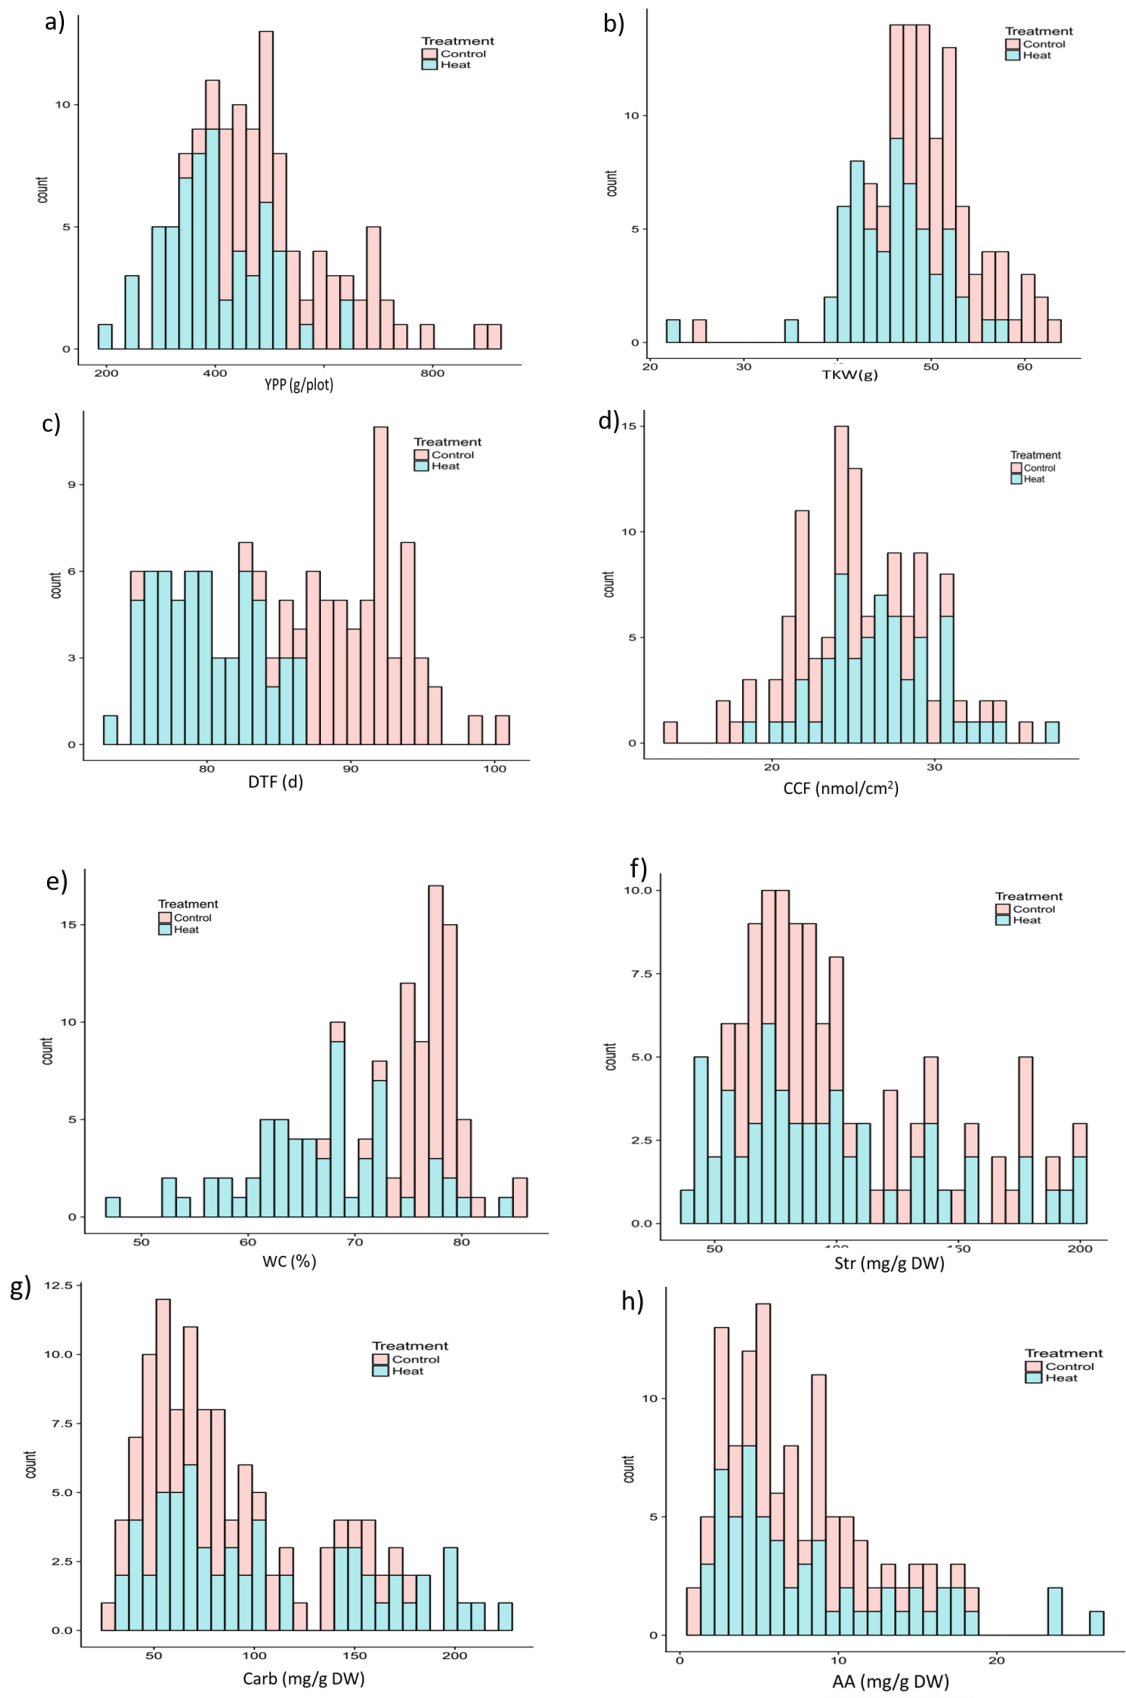

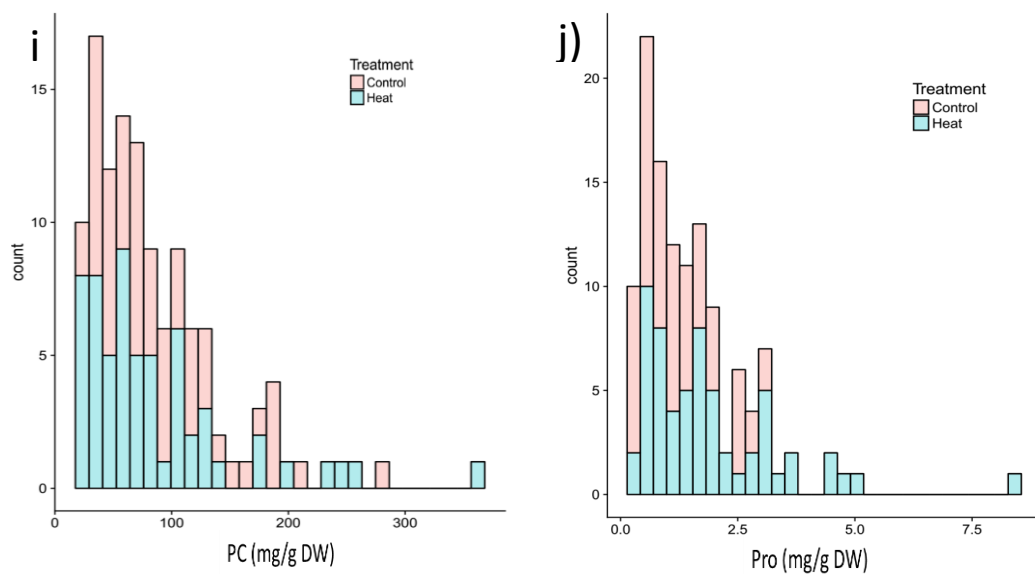

**Figure 2.** Histogram shows the distribution of the traits under control and pre-anthesis heat in barley; a) Yield per plot (YPP, g/plot), b) Thousand kernel weight (TKW, g), c) Day to flowering (DTF, d), d) Chlorophyll content at flowering (CFF, nmol/cm<sup>2</sup>), e) Water content (WC, %), f) Starch (Str, mg/g DW), g) Carbohydrates (Carb, mg/g DW), h) Amino acids (AA, mg/g DW), i) Protein content (PC, mg/g DW) and j) Proline (Pro, mg/g DW)..
